# Supplementary material for: Murine breast cancer feed arteries are thin-walled with reduced α1A-adrenoceptor expression and attenuated sympathetic vasocontraction
Source: Springer Nature journal article supplement (doi:10.1186/s13058-018-0952-8), 2018-03-22
Supplement: MOESM1 [file 15557170]

Additional data for:

**Murine breast cancer feed arteries are thin-walled with reduced  
 $\alpha_{1A}$ -adrenoceptor expression and attenuated sympathetic  
vasocontraction**

Anne Sofie Froelunde, Marit Ohlenbusch, Kristoffer B. Hansen, Nicolai Jessen, Sukhan Kim,  
Ebbe Boedtkjer

Department of Biomedicine, Aarhus University, Denmark

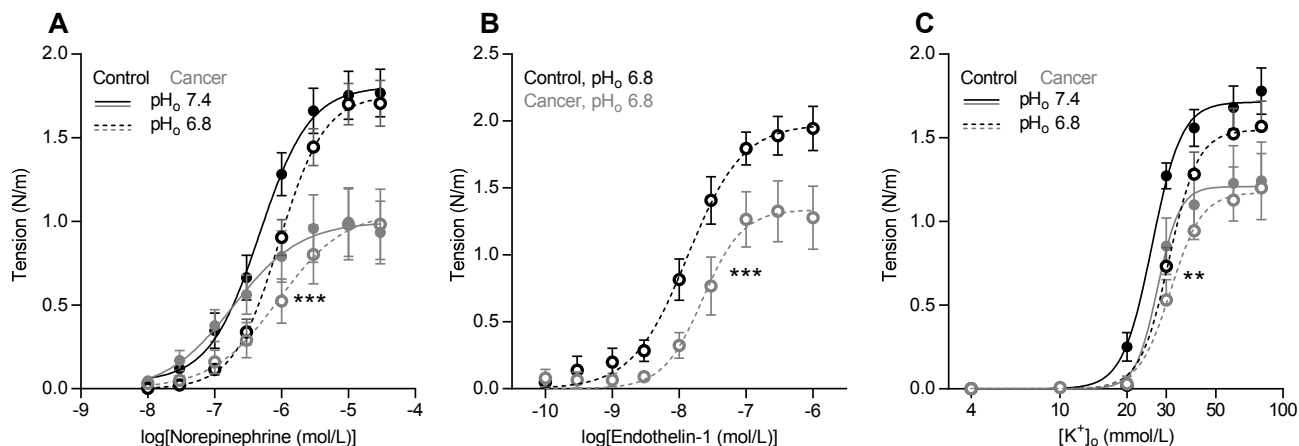

**Additional Figure S1.** Vasocontraction is attenuated in breast cancer feed arteries compared to matched control arteries under acidic conditions. Concentration-dependent contractions in response to norepinephrine (**A**), endothelin-1 (**B**), and elevated  $[K^+]_o$  (**C**) at pH<sub>o</sub> 6.8 (n=8). For norepinephrine and  $K^+$ , contractions elicited in the same arteries at pH<sub>o</sub> 7.4 are shown for comparison. Because of slow relaxation of arteries after washout of endothelin-1, vasocontraction to endothelin-1 was only tested at one level of pH<sub>o</sub> for each artery. Experiments with elevated  $[K^+]_o$  were performed in presence of 1  $\mu$ mol/L phentolamine. Curves are results of least-squares fits to sigmoidal functions and compared using extra sum-of-squares *F*-tests. \*\* $P < 0.01$ , \*\*\* $P < 0.001$  vs. Control, both at pH<sub>o</sub> 6.8.
